# Supplementary material
Source: publisher figshare collection journal article supplement (https://frontiersin.figshare.com/ndownloader/files/13267553)
Supplement: Supplementary file [file 13267553]

## Lipidomics in major depressive disorder: a systematic review

### Supplementary Material

Walther, A.<sup>1</sup>, Cannistraci, C.<sup>2</sup>, Simons, K.<sup>3</sup>, Durán, C.<sup>2</sup>, Gerl, MJ.<sup>3</sup>, Wehrli, S.<sup>1</sup> & Kirschbaum, C.<sup>1</sup>

<sup>1</sup> Biological Psychology, TU Dresden, Dresden, Germany

<sup>2</sup> Biomedical Cybernetics, Biotechnological Center TU Dresden, TU Dresden, Germany

<sup>3</sup> Lipotype, Biotechnological Center TU Dresden, TU Dresden, Dresden, Germany

**Supplementary table 1. Overview of most differential lipids between studies**

|                | Chan et al.,<br>2018 | Chen et al.,<br>2014 | Demirkan et<br>al., 2013 | Faria et al.,<br>2014 | Hennebelle et<br>al., 2017 | Kim et al.,<br>2018 | Knowles et<br>al., 2017 | Kuwano et<br>al., 2018 | Lee et al.,<br>2009 | Lee et al.,<br>2012 | Liu et al.,<br>2016 | Oliveira et<br>al., 2016 |
|----------------|----------------------|----------------------|--------------------------|-----------------------|----------------------------|---------------------|-------------------------|------------------------|---------------------|---------------------|---------------------|--------------------------|
| Lipid<br>class |                      |                      |                          |                       |                            |                     |                         |                        |                     |                     |                     |                          |
|                | LPC                  | LPC                  | Cer                      | CL                    |                            | CE                  | PC O                    |                        | Cer                 | LPC                 | LPC                 | APS                      |
|                | PI                   | LPC O                | LPC                      | PC                    |                            | DAG                 | PC P                    |                        | LPC                 | PC                  | LPE                 | CE                       |
|                | PS                   | PC                   | PC                       | PE                    |                            | LPA                 |                         |                        | PC                  | PE                  | PC                  | Cer                      |
|                | SM                   | PC O                 | PC O                     | PI                    |                            | LPC                 |                         |                        | PE                  |                     | PC O                | dhSM                     |
|                |                      | TAG                  | PE                       |                       |                            | LPI                 |                         |                        | SM                  |                     | PE                  | LacCer                   |
|                |                      |                      | PLPE                     |                       |                            | PI                  |                         |                        |                     |                     | PE O                | LPC                      |
|                |                      |                      | SM                       |                       |                            | PS                  |                         |                        |                     |                     | PI                  | LPE                      |
|                |                      |                      |                          |                       |                            | TAG                 |                         |                        |                     |                     | SM                  | PC                       |
|                |                      |                      |                          |                       |                            |                     |                         |                        |                     |                     | TAG                 | PC E                     |
|                |                      |                      |                          |                       |                            |                     |                         |                        |                     |                     |                     | PE                       |
|                |                      |                      |                          |                       |                            |                     |                         |                        |                     |                     |                     | PI                       |
|                |                      |                      |                          |                       |                            |                     |                         |                        |                     |                     |                     | SM                       |
|                |                      |                      |                          |                       |                            |                     |                         |                        |                     |                     |                     | Sulf(2OH)                |
|                |                      |                      |                          |                       |                            |                     |                         |                        |                     |                     |                     | TAG                      |

| Lipid species | Chan et al., 2018 | Chen et al., 2014 | Demirkan et al., 2013 | Faria et al., 2014 | Hennebelle et al., 2017 | Kim et al., 2018 | Knowles et al., 2017 | Kuwano et al., 2018 | Lee et al., 2009    | Lee et al., 2012 | Liu et al., 2016 | Oliveira et al., 2016 |
|---------------|-------------------|-------------------|-----------------------|--------------------|-------------------------|------------------|----------------------|---------------------|---------------------|------------------|------------------|-----------------------|
|               |                   | LPC 18:1          | Cer 18:0              |                    |                         | CE 20:5          | PC P 36:5            |                     | Cer 18:1/18:0       | LPC 16:0         | LPC 16:0         | Cer 16:0              |
|               |                   | LPC 18:2          | Cer 20:0              |                    |                         | DAG 32:0         | PC P 36:2            |                     | Cer 18:1/20:0       | LPC 18:1         | LPC 16:1         | Cer 16:1              |
|               |                   | LPC 20:1          | LPC 20:5              |                    |                         | DAG 36:1         | PC P 38:5            |                     | Cer 18:1/22:0       | LPC 20:4         | LPC 18:1         | Cer 18:1              |
|               |                   | LPC O 16:2        | PC 38:6               |                    |                         | DAG 36:8         | PC P 40:5            |                     | Cer 18:1/24:0       | PC 32:0          | LPE 16:0         | Cer 22:1              |
|               |                   | LPC O 18:3        | PC O 34:2             |                    |                         | LPA 16:1         | PC O 36:2            |                     | LPC 16:0            | PC 36:4          | LPE 18:0         | Cer 26:1              |
|               |                   | PC 32:1           | PC O 36:5             |                    |                         | LPA 22:4         | PC O 36:4            |                     | LPC 18:0            | PC 38:3          | LPE 18:1         | dhSM 16:0             |
|               |                   | PC 36:4           | PC O 36:4             |                    |                         | LPC 16:1         | PC O 36:3            |                     | LPC 18:2            | PC 38:4          | LPE 18:2         | dhSM 16:1             |
|               |                   | PC 36:5           | PC O 38:1             |                    |                         | LPI 16:0         | PC O 32:0            |                     | PC 32:0             | PC 38:5          | LPE 20:4         | dhSM 18:0             |
|               |                   | PC 37:4           | PC O 38:4             |                    |                         | LPI 18:2         | PC O 32:1            |                     | PC 36:1             | PC 38:6          | PC 32:0          | dhSM 18:1             |
|               |                   | PC 38:4           | PC O 38:5             |                    |                         | PI 32:1          | PC O 32:2            |                     | PC 38:3             | PC 40:2          | PC 34:1          | dhSM 20:0             |
|               |                   | PC 38:5           | PC O 40:4             |                    |                         | PI 32:2          | PC O 34:0            |                     | PC 40:2             | PC 40:4          | PC 36:1          | dhSM 22:0             |
|               |                   | PC 38:6           | PC O 40:6             |                    |                         | PI 34:1          | PC O 34:2            |                     | PC 40:5             | PC 40:5          | PC 38:2-1        | dhSM 22:1             |
|               |                   | PC 40:6           | PE 32:2               |                    |                         | PI 34:2          | PC O 34:1            |                     | PC 40:6             | PC 40:6          | PC 38:5-1        | dhSM 24:0             |
|               |                   | PC O 36:4         | PE 34:2               |                    |                         | PI 34:3          | PC O 36:0            |                     | PC 42:5             | PE 34:1          | PC 40:5          | dhSM 24:1             |
|               |                   | PC O 38:5         | PE 36:5               |                    |                         | PI 36:1          | PC O 35:4            |                     | PC 42:6             | PE 38:4          | PC 42:1          | dhSM 26:0             |
|               |                   | TAG 58:12         | PE 36:2               |                    |                         | PI 36:2          | PC O 34:4            |                     | PC 42:7             | PE 38:5          | PC O 34:2        | dhSM 26:1             |
|               |                   | TAG 60:12         | PE 38:1               |                    |                         | PI 36:3          | PC O 38:5            |                     | PE 36:4             | PE 38:6          | PC O 42:5        | dhSM 26:2             |
|               |                   | TAG 62:13         | PE 40:3               |                    |                         | PS 34:2          | PC O 38:4            |                     | PE 36:5             | PE 40:4          | PC O 44:5        | LacCer 18:0           |
|               |                   | TAG 62:14         | PE 40:4               |                    |                         | TAG 44:0         | PC P 32:0            |                     | SM 34:0 (18:0/16:0) | PE 40:5          | PE 36:1          | LacCer 24:0           |
|               |                   |                   | PE 40:5               |                    |                         | TAG 44:2         | PC P 34:1            |                     | SM 42:0 (18:0/24:0) | PE 40:6          | PE 36:3          | LacCer 26:1           |
|               |                   |                   | PE 40:6               |                    |                         | TAG 46:0         | PC P 32:1            |                     | SM 42:1 (18:0/24:1) | PE 40:7          | PE 36:4          | LPC 16:0              |
|               |                   |                   | PE O 38:7             |                    |                         | TAG 46:1         | PC O 30:0            |                     |                     |                  | PE O 34:3        | PA 40:5               |
|               |                   |                   | PE O 40:3             |                    |                         | TAG 46:3         | PC O 36:1            |                     |                     |                  | PE O 36:3        | PA 40:6               |
|               |                   |                   | PLPE 18:1/18:1        |                    |                         | TAG 48:1         | PC O 36:5            |                     |                     |                  | PE O 36:5        | PG 36:1               |
|               |                   |                   | PLPE 18:1/18:2        |                    |                         | TAG 48:2         | PC O 40:7            |                     |                     |                  | PE O 38:5        | PC 36:1               |

## Lipidomics in major depressive disorder

PLPE 16:0/18:1

PLPE 18:0

SM 15:0

SM 16:0

SM 23:1

SM 23:0

TAG 48:4 PC P 34:2

TAG 50:1

TAG 50:2

TAG 50:3

TAG 50:4

TAG 52:6

TAG 54:4

TAG 54:5

TAG 54:6

TAG 54:7

TAG 54:8

PE O 38:6 PC 38:0

PE O 38:7 PC 38:1

PE O 40:7 PC 38:2

PI 34:1 PC E 34:1

PI 36:1 PC E 36:1

PI 38:4 PC E 38:2

PI 38:6 PC E 38:3

PI 40:4 PC E 38:4

PI 40:5 PE 34:0

PI 40:6 PE 34:1

SM 36:1;2 PE 34:2

SM 36:2;2 PE 36:0

SM 38:1;2 PE 36:1

SM 38:2;2 PE 36:2

SM 39:1;2 PE 36:3

SM 40:3;2 PE 36:4

SM 41:1;2 PE 38:0

SM 42:3;2 PE 38:1

TAG 42:0 PE 38:2

TAG 42:1 PE 38:3

TAG 44:0 PE 38:4

TAG 44:1 PE 38:5

TAG 44:2 PE 38:6

TAG 46:1 PE 40:4

TAG 46:2 PE 40:5

TAG 46:3 PE 40:6

TAG 48:4 PE 42:5

TAG 50:0 PE 42:6

SM 16:0

SM 20:0

SM 22:0

SM 24:0

SM 26:0

---

**Legend:** APS: acylphosphatidylserine, BMP: bismonoacylglycerolphosphate, Cer: ceramide, IcCer: long-chain ceramide, LacCer: lactosylceramide, CE: cholesteryl ester, CL: cardiolipin, DAG: diacylglycerol, GM3: monosialodihexosylganglioside, Glu: glucosylceramide, HexCer: hexosylceramide, LPA: lysophosphatidic acid, LPC: lysophosphatidylcholine, LPC E: ether lysophosphatidylcholine, LPE: lysophosphatidylethanolamine, LPI: lysophosphatidylinositol, LPC: lysophosphatidylcholines, PA: phosphatidic acid, PC: phosphatidylcholine, PC E: ether phosphatidylcholine, PC O: alkylphosphatidylcholine, PE: phosphatidylethanolamine, PE O: alkenylphosphatidylethanolamine, PG: phosphatidylglycerol, PI: palmitic acid, PLPE: phosphatidylethanolamine-based plasmalogen, PS: phosphatidylserine, SM: sphingomyelin, dhSM: dihydrosphingomyelin, Sulf(2OH): 2- hydroxy N-acyl sulfatide, TAG: triacylglycerol, 24-OHC: 24(S)-hydroxycholesterol. For Chan et al. 2018 the differential lipids were named after their head-group and the relevant compounds within this structure. If lipid species could not be clearly assigned, the annotation of the primary report was retained.
